# Supplementary material
Source: ML conference proceedings conference paper supplement (https://openreview.net/forum?id=UQcr8eug6N)

# PSD(a) GR2 N=100

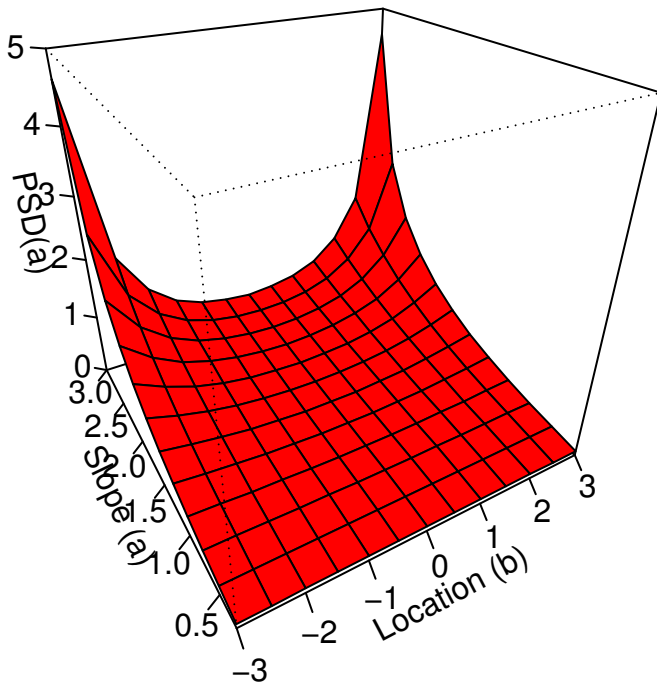

Supplement: supplementary_material [file attachment]

# PSD(b1) GR3 a=1.5 N=1000

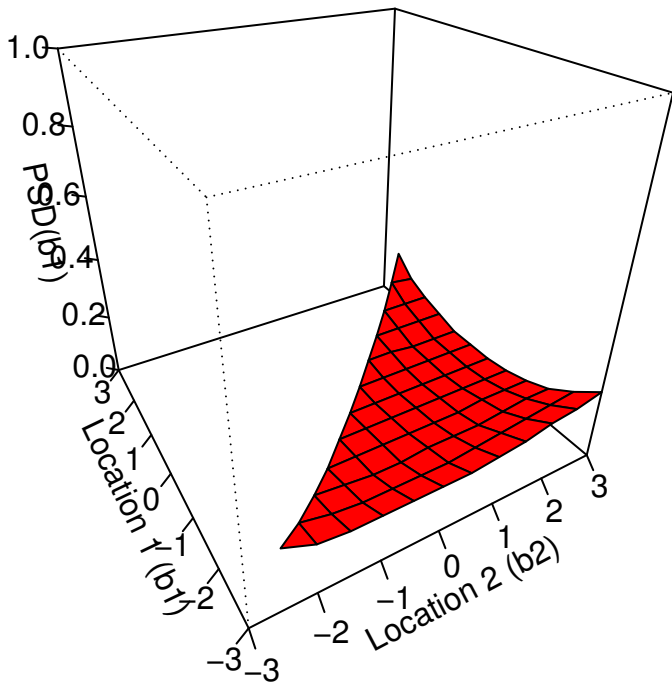

Supplement: supplementary_material [file attachment]

# PSD(b) GR2 N=1000

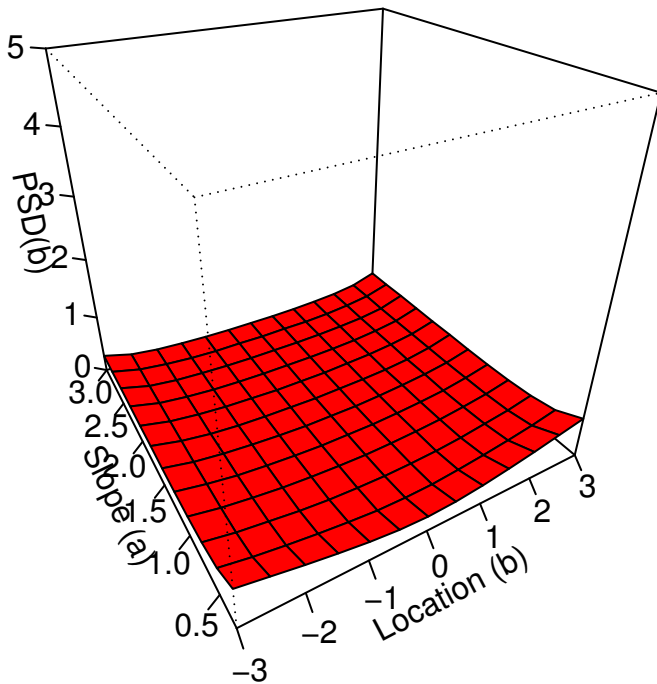

Supplement: supplementary_material [file attachment]

# SE(a) GR3 a=1.5 N=100

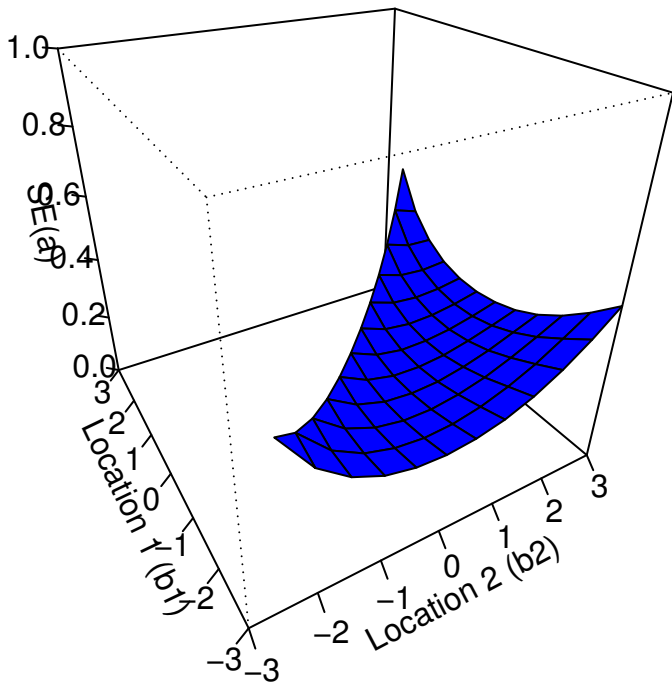

Supplement: supplementary_material [file attachment]

# SE(a) GR2 N=1000

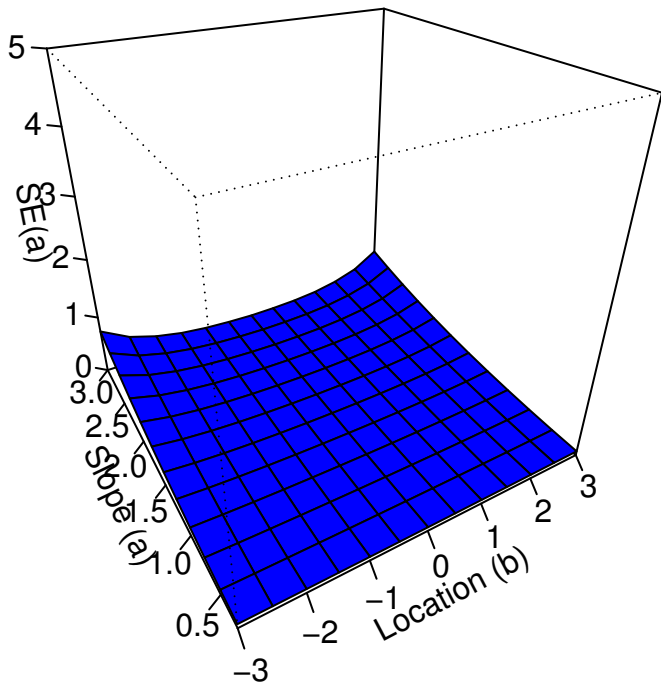

Supplement: supplementary_material [file attachment]

# SE(b2) GR3 a=1.5 N=100

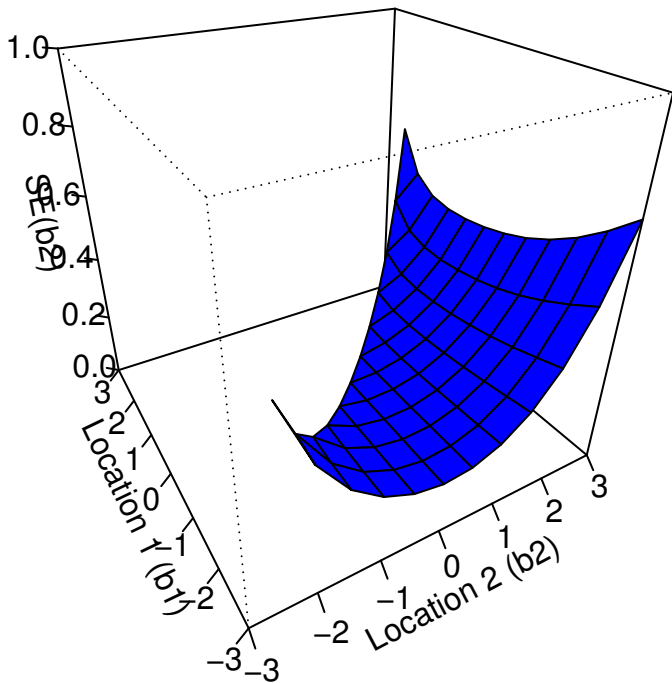

Supplement: supplementary_material [file attachment]

# PSD(a) GR3 a=1.5 N=100

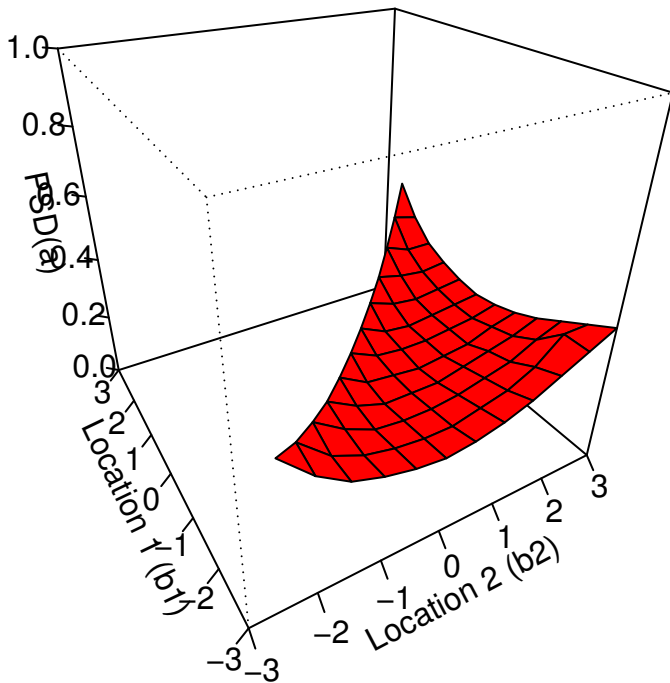

Supplement: supplementary_material [file attachment]

# SE(a) GR2 N=100

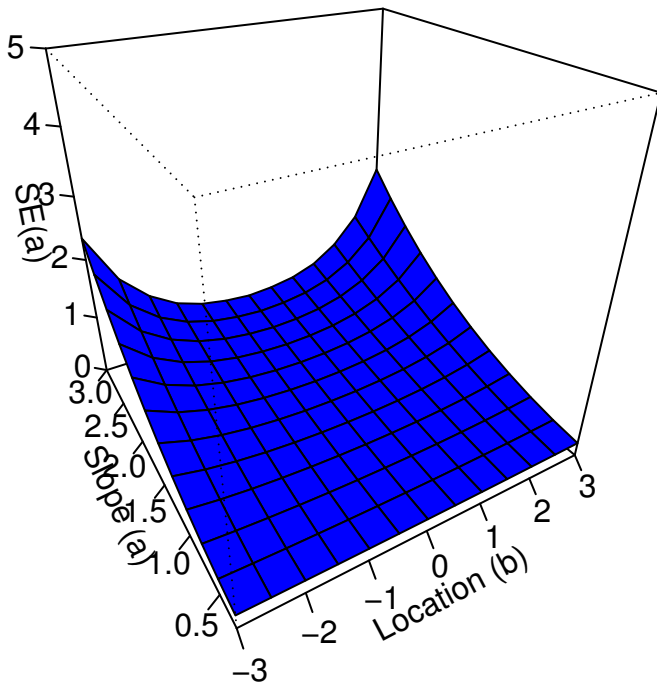

Supplement: supplementary_material [file attachment]

# SE(a) GR3 a=1.5 N=1000

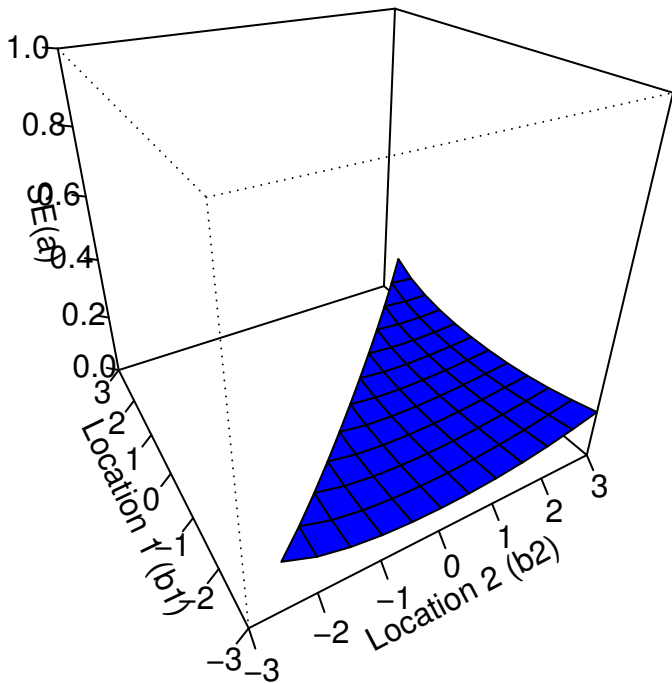

Supplement: supplementary_material [file attachment]

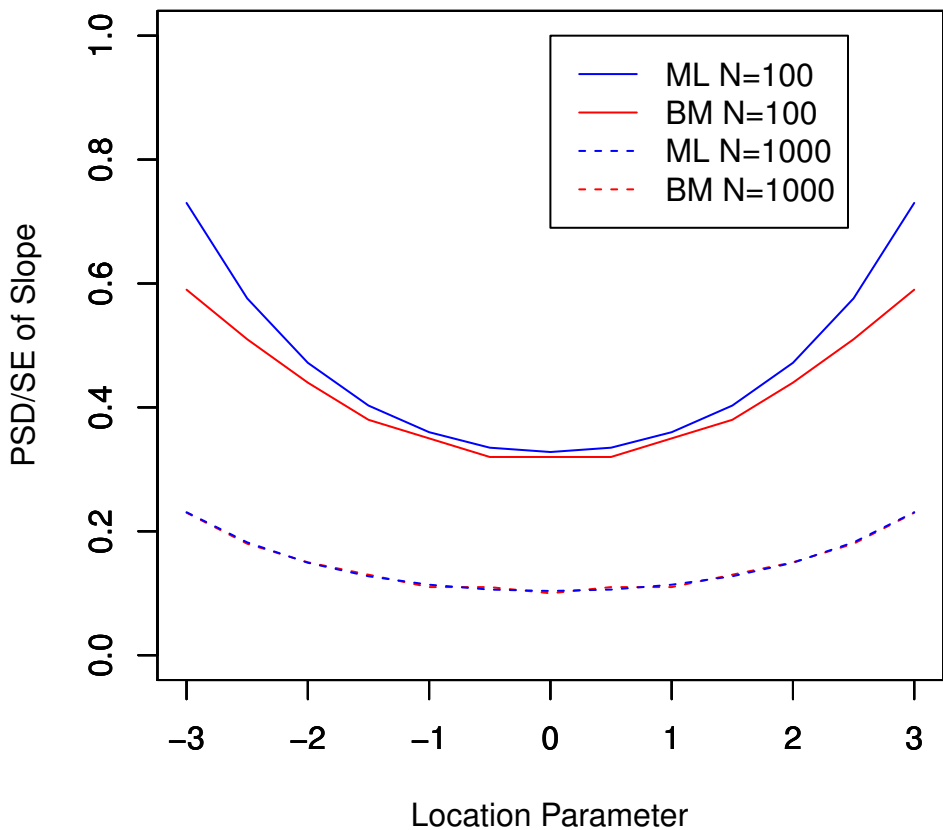

Supplement: supplementary_material [file attachment]

# SE(b) GR2 N=100

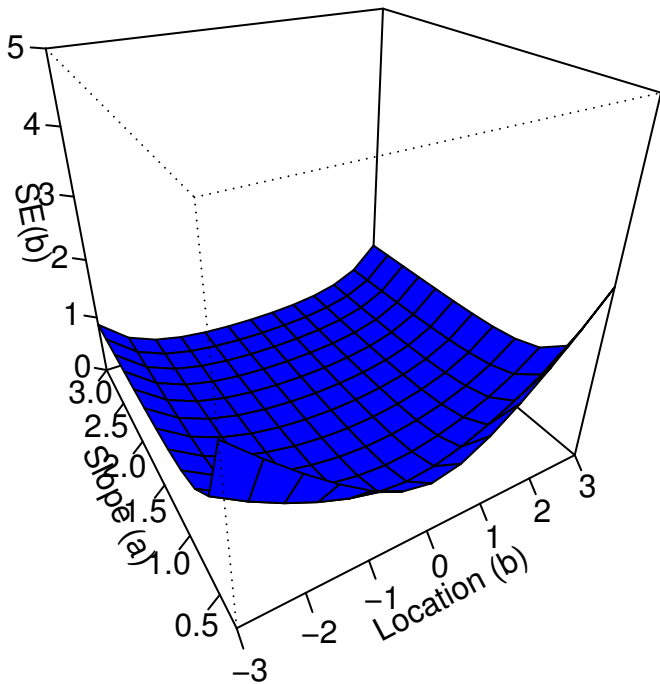

Supplement: supplementary_material [file attachment]

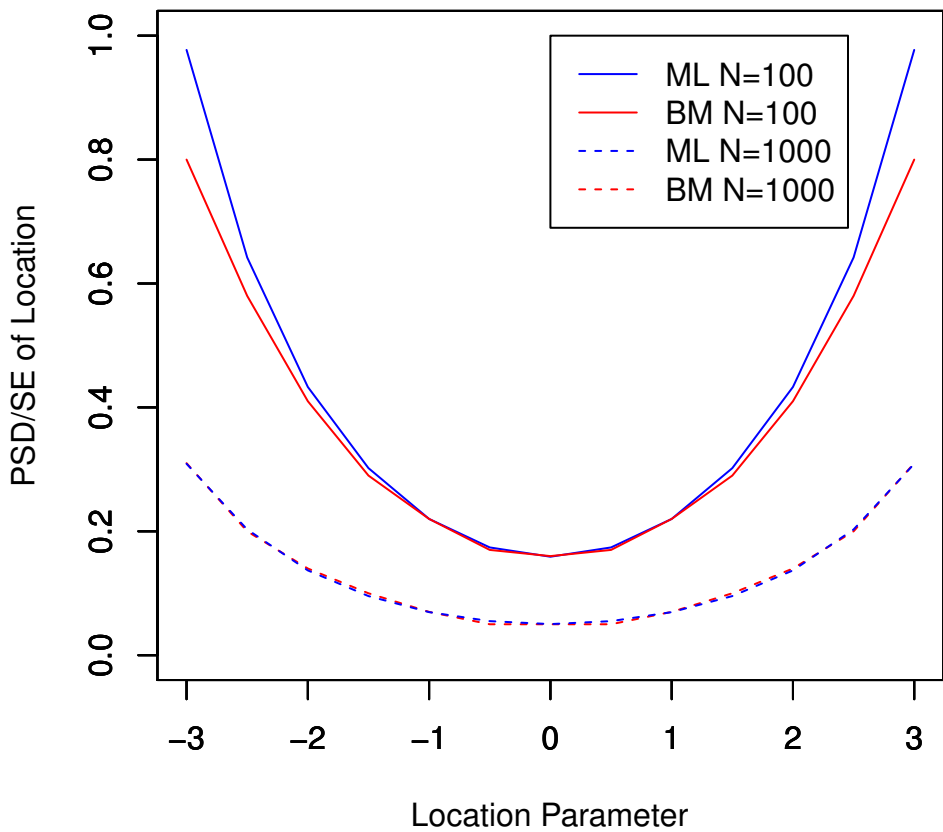

Supplement: supplementary_material [file attachment]

# SE(b2) GR3 a=1.5 N=1000

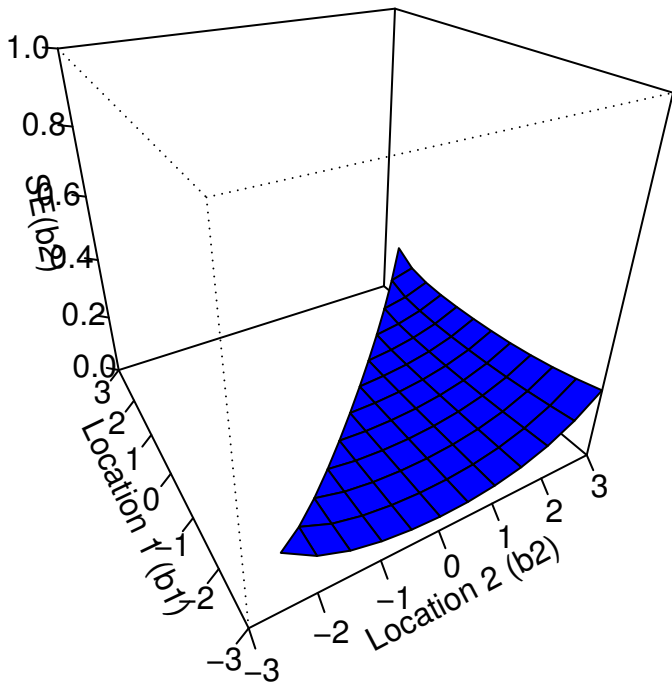

Supplement: supplementary_material [file attachment]

# PSD(b1) GR3 a=1.5 N=100

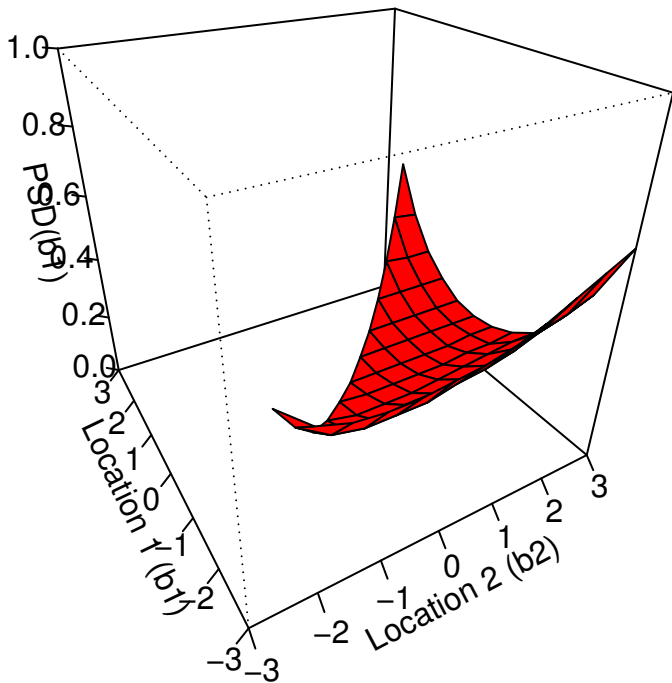

Supplement: supplementary_material [file attachment]

# PSD(b) GR2 N=100

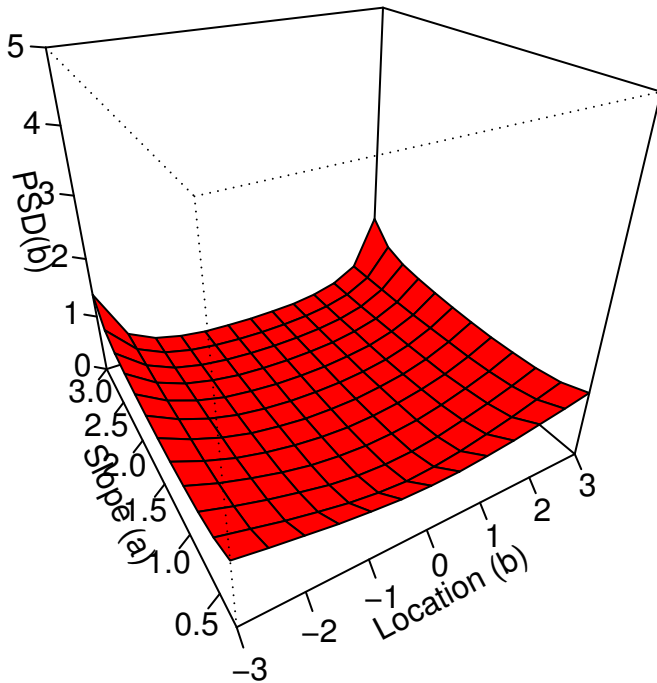

Supplement: supplementary_material [file attachment]

# PSD(a) GR3 a=1.5 N=1000

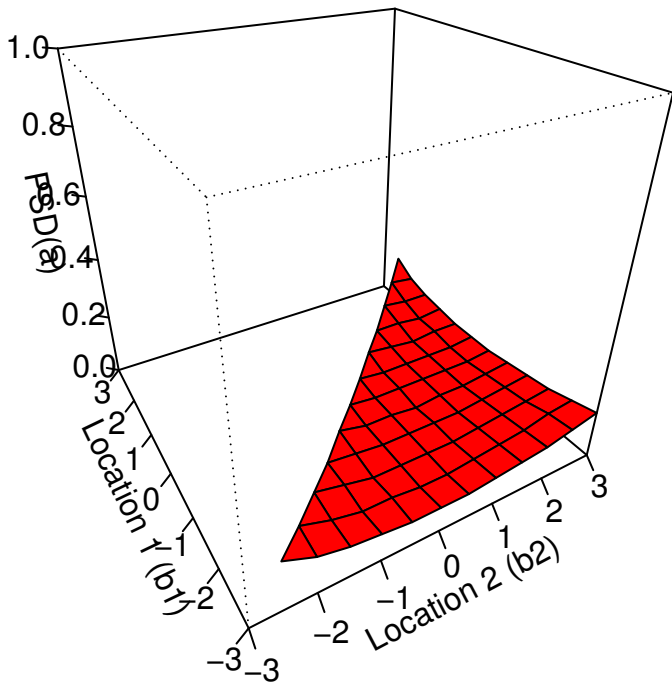

Supplement: supplementary_material [file attachment]

# PSD(b2) GR3 a=1.5 N=1000

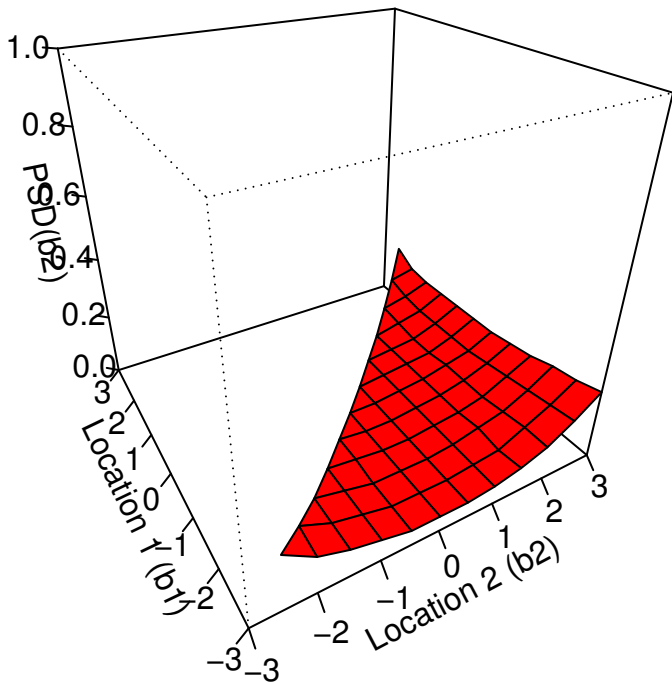

Supplement: supplementary_material [file attachment]

# SE(b1) GR3 a=1.5 N=100

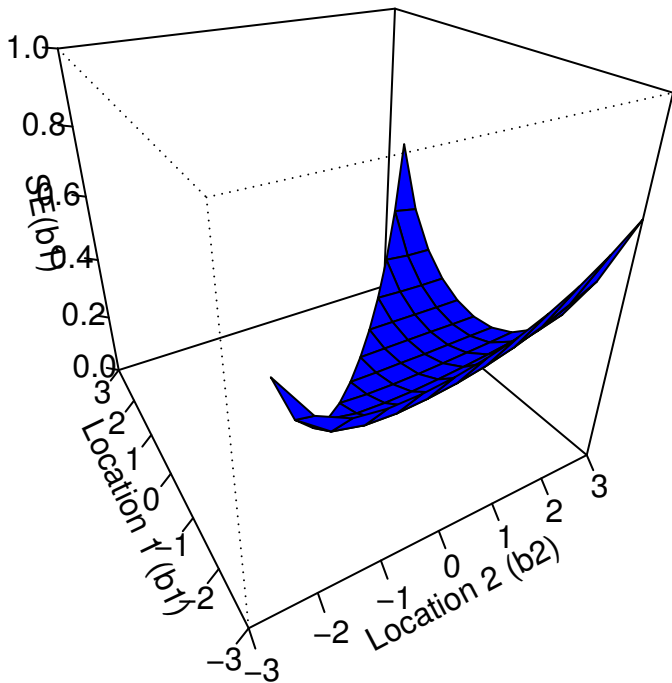

Supplement: supplementary_material [file attachment]

# PSD(a) GR2 N=1000

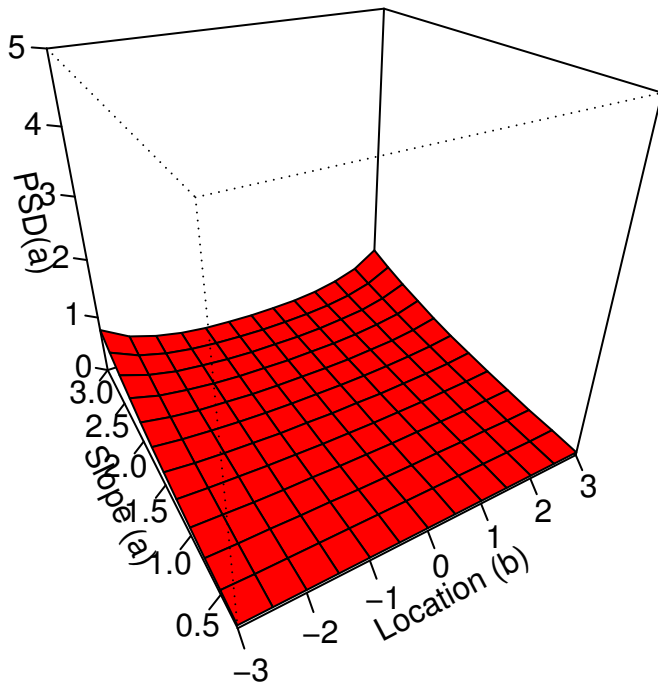

Supplement: supplementary_material [file attachment]

# PSD(b2) GR3 a=1.5 N=100

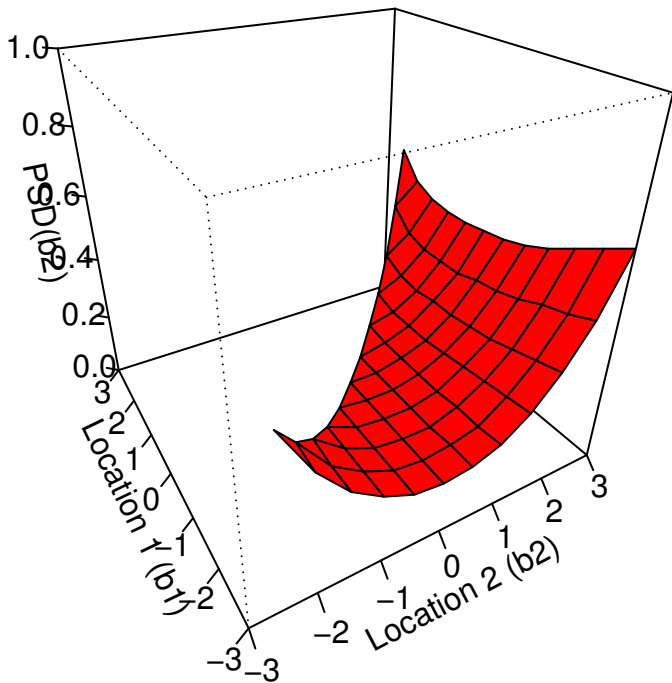

Supplement: supplementary_material [file attachment]

# SE(b1) GR3 a=1.5 N=1000

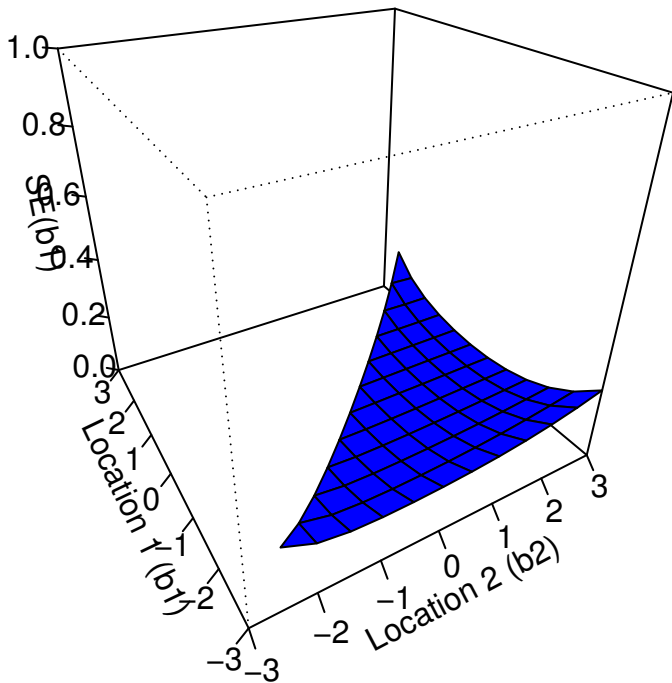

Supplement: supplementary_material [file attachment]

# SE(b) GR2 N=1000

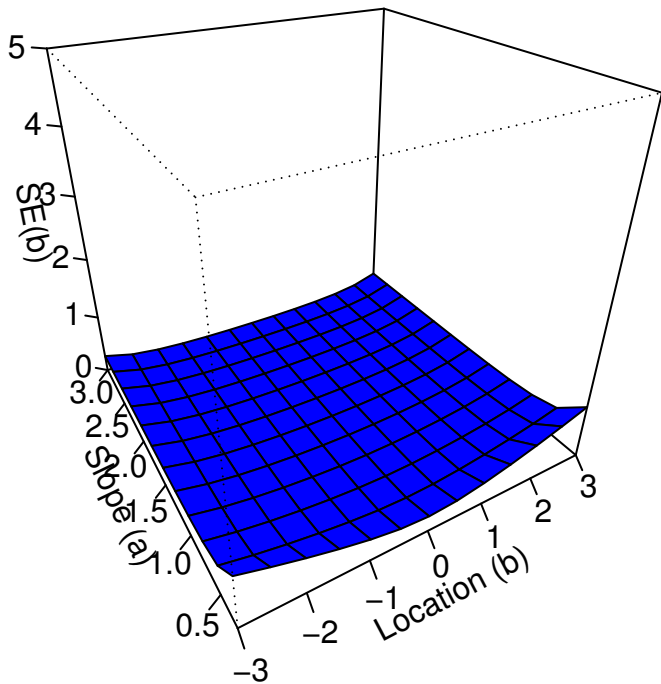

Supplement: supplementary_material [file attachment]
